# Supplementary material
Source: PubMed Central journal article supplement (PMC4314816)
Supplement: chest_147_2_397_ds01.pdf [file chest_147_2_397_ds01.pdf]

# The Effect of Omega-3 Fatty Acids on Bronchial Hyperresponsiveness, Sputum Eosinophilia, and Mast Cell Mediators in Asthma

John D. Brannan, PhD; Johan Bood, PhD; Ahmad Alkhabaz, MD; David Balgoma, PhD; Joceline Otis, BSc; Ingrid Delin, BSc; Barbro Dahlén, MD, PhD; Craig E. Wheelock, PhD; Parameswaran Nair, MD, PhD; Sven-Erik Dahlén, MD, PhD; and Paul M. O'Byrne, MB, FCCP

CHEST 2015; 147(2):397-405

## e-Appendix 1.

### METHODS

#### Subjects

Fifty-four subjects were screened and 28 subjects were entered. (Figure 1) Five subjects withdrew from the study leaving 23 subjects. There was one serious adverse event that was unrelated to the study treatments or procedures however the subject was not withdrawn. Five subjects from the original 28 recruited withdrew from the study; one subject experienced fishy reflux and could only tolerate two weeks of the 3-weeks treatment period; one subject changed asthma medication dose during the study violating protocol; two subjects were withdrawn due to exacerbations at the end of the first treatment period (one on placebo, one on the omega-3 supplements); one subject withdrew due to personal reasons. This left 23 subjects of which 12 were steroid-naïve taking beta<sub>2</sub> agonists only as needed (p.r.n), and 11 were taking regular inhaled corticosteroids (ICS) with or without long-acting beta<sub>2</sub> agonists (ICS dose <1000 mcg fluticasone/day).

The study was performed at the Firestone Institute for Respiratory Health and subject recruitment commenced in October 2007 with the last subject completing the study in January 2009. Subsequent *in vitro* analyses were performed at the Karolinska Institute and were completed in June 2012.

*Online supplements are not copyedited prior to posting.*

## Study Design

**e-Figure 1: Schematic of the study design**

| Intervention:                         | Treatment 1: |                       |         | Treatment 2:          |   |
|---------------------------------------|--------------|-----------------------|---------|-----------------------|---|
|                                       | Run-in       | Omega-3<br>or Placebo | Washout | Omega-3<br>or Placebo |   |
| Duration:                             | 2-weeks      | 3-weeks               | 3-weeks | 3-weeks               |   |
| ICS group visit:                      | 1            | 2                     | 3       | 4                     | 5 |
| $\beta_2$ agonist p.r.n. group visit: | 1            | 2                     | 3       | 4                     |   |

### Mannitol bronchial provocation challenge

A mannitol challenge (Aridol™, Pharmaxis Ltd., Australia) was performed as previously described<sup>1</sup>, and FEV<sub>1</sub> was used as the index of change in airway calibre (VMax, Jaeger, Germany). A low resistance dry powder inhaler (Plastiape, Osanago, Italy) was used to administer progressively increasing doses of mannitol; the dose protocol consists of 0 (empty capsule acting as a placebo), 5, 10, 20, 40, 80, 160, 160 and 160 mg mannitol. The challenge was completed when a  $\geq 20\%$  reduction in FEV<sub>1</sub> was documented or when the maximum cumulative dose (635 mg) of mannitol had been administered. Subjects were entered into the study if they had a provoking dose of mannitol to cause a 15% fall (PD<sub>15</sub>) < 315 mg on the initial study visit. Spontaneous recovery of FEV<sub>1</sub> was monitored following mannitol at 5-min and then at 10-min intervals to 20-min following the challenge.

### Treatment randomisation

Randomisation was computer generated using an online random number generator and treatments were blinded by the same single investigator who was not involved in performing the tests on the study participants (JO). All other investigators and study participants were blinded throughout the trial. The random numbers were allocated so there were even numbers of subjects who commenced with the placebo and active treatments. All treatments were labelled with a study participant number and a sequence for the first and second treatment periods. This was performed separately for the group taking beta<sub>2</sub> agonists p.r.n and those taking regular ICS.

### Sputum induction and examination

Immediately following the mannitol challenge and airway recovery subjects were administered 200mcg salbutamol and FEV<sub>1</sub> was measured 10-min later until minimum of within 5% of the pre-mannitol FEV<sub>1</sub> was achieved. Subjects were then administered 7-min exposures of 3, 4 and 5% hypertonic saline using an ultrasonic nebuliser. Between each exposure subjects were asked to expectorate into a sterile

*Online supplements are not copyedited prior to posting.*

container an adequate sample of sputum as described.<sup>2</sup> Sputum induction and examination for total and differential cell counts were performed.

### **Symptoms**

Subjects were asked to complete the self-administered Asthma Quality of Life Questionnaire (AQLQ)<sup>3</sup> at baseline and the Asthma Control Questionnaire (ACQ) at all visits.<sup>4</sup> Permission has been obtained for the use of the ACQ and AQLQ.

### **Blood triglycerides and free fatty acid analysis**

Omega-3 fatty acid supplements are known to increase the free fatty acids of omega-3s in the blood and to lower blood triglycerides.<sup>5</sup> This was used as a measure of adherence to the treatment. Following overnight fasting for 12 hrs, blood samples were taken from each subject on arrival to the laboratory. Analysis was performed using a Johnson & Johnson Vitros 700 Analyzer (Raritan, NJ, USA). The full data on lipid mediator serum levels are reported by Lundström et al.<sup>6</sup> The measured levels in serum are in rough agreement with the levels found in a larger study on plasma levels in healthy controls.<sup>7</sup>

### **Enzyme Immune Assay**

Enzyme immunoassay of PGD<sub>2</sub> metabolites (11β-PGF<sub>2</sub> and 2,3-dinor-11β-PGF<sub>2α</sub>) and LTE<sub>4</sub> was performed in serially diluted urine samples, using a rabbit polyclonal antiserum and acetylcholinesterase-linked tracer (Cayman Chemical Company, Ann Arbor, MI, USA) essentially as described previously.<sup>8,9</sup> The antibody developed against 9α,11β-PGF<sub>2</sub> cross-reacted with 2,3-dinor-11β-PGF<sub>2α</sub> (10%), 13,14-dihydro-15-keto-prostaglandinF<sub>2α</sub> (0.5%) and all other primary eicosanoid metabolites (below 0.01%). The specificity of the antiserum for LTC<sub>4</sub> was 100%, for LTD<sub>4</sub> 100% and for LTE<sub>4</sub> 67%. Analysis of creatinine were performed using a modification of Jaffe's creatinine protocol as described previously.<sup>10</sup> The results are expressed as nanograms (ng) of excreted mediator per mmol of creatinine.

### **Mass Spectrometry**

The oxylipins in urine were analyzed by modification of published methods.<sup>11,12</sup> Metabolites in urine were extracted by solid phase extraction (60mg HLB Oasis, Waters, MA, USA). An Acquity UPLC separation module coupled to a Xevo triple quadrupole mass spectrometer equipped with an electrospray source was used for analyses (Waters, MA, USA). Compounds were quantified by external and deuterated internal standards (Cayman Chemicals, Ann Arbor, MI, USA). The methods have been described in greater detail by Lundström et al.<sup>13,14</sup> and Balogma et al.<sup>15</sup>

*Online supplements are not copyedited prior to posting.*

## RESULTS

**e-Table 1. Urinary mediators LC/MS/MS, n=5 (ng/mmol creatinine)**

| <b>Mediator</b>                              | <b>Placebo</b> | <b>Omega-3</b> |          |
|----------------------------------------------|----------------|----------------|----------|
| Tetranor-Prostaglandin DM                    | 82±37          | 47±12          | ns       |
| 2,3-dinor-11β-Prostaglandin F <sub>2α</sub>  | 86±19          | 51±6           | ns       |
| Prostaglandin E <sub>2</sub>                 | 141±52         | 29±19          | p=0.048  |
| Tetranor-Prostaglandin EM                    | 449±236        | 211±72         | ns       |
| Prostaglandin F <sub>2α</sub>                | 122±23         | 98±19          | ns       |
| 11-dehydro-Thromboxane B <sub>2</sub>        | 36±11          | 21±8           | ns       |
| 8-isoProstaglandin F <sub>2α</sub>           | 36±5           | 31±7           | ns       |
| 2,3-dinor-8-isoProstaglandin F <sub>2α</sub> | 452±84         | 337±42         | ns       |
| 8,12-iso-iPF F <sub>2α</sub> -VI             | 730±129        | 581±103        | p=0.0117 |
| Leukotriene E <sub>4</sub>                   | 3±1            | 3±1            | ns       |
| Lipoxin A <sub>4</sub>                       | 41±15          | 44±8           | ns       |
| 8,9-DiHETrE                                  | 25±16          | 9±3            | ns       |
| 9-HODE                                       | 16±6           | 7±3            | ns       |
| 13-HODE                                      | 55±34          | 29±12          | ns       |
| 9-KODE                                       | 17±7           | 9±3            | ns       |
| 13-KODE                                      | 40±30          | 18±4           | ns       |
| 9,10,13-TriHOME                              | 52±29          | 43±22          | ns       |
| 9,12,13-TriHOME                              | 44±12          | 24±4           | ns       |
| 9(10)-EpOME                                  | 14±6           | 7±3            | ns       |
| 9,10-DiHOME                                  | 107±54         | 49±33          | ns       |
| 12,13-DiHOME                                 | 7±3            | 3±1            | ns       |

*Online supplements are not copyedited prior to posting.*

**e-Figure 2. Individual PD<sub>15</sub> values for Omega-3 and placebo in relation to baseline PD<sub>15</sub>**

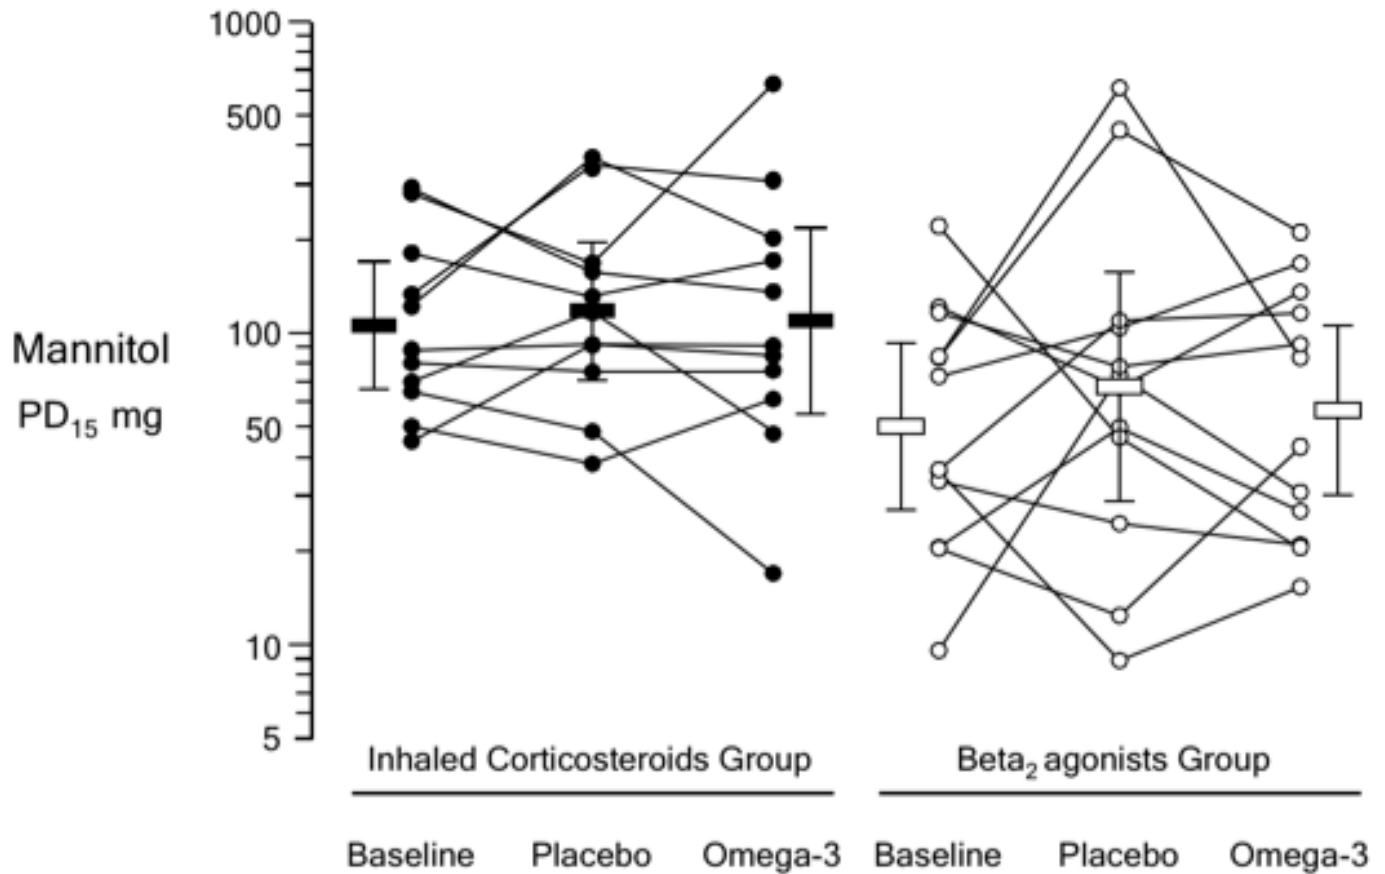

There was no significant difference in PD<sub>15</sub> between the Baseline (screening visit), Placebo and Omega-3 visits. The baseline values are the first laboratory visit of each subject; the Run-in visit values for the inhaled corticosteroid group and the first visit of the beta2 agonist group. Superimposed on the individual data points are the Geometric mean (95% CI).

*Online supplements are not copyedited prior to posting.*

**e-Figure 3. Area under the FEV<sub>1</sub> vs time (30 min) post challenge recovery period separated by treatment group**

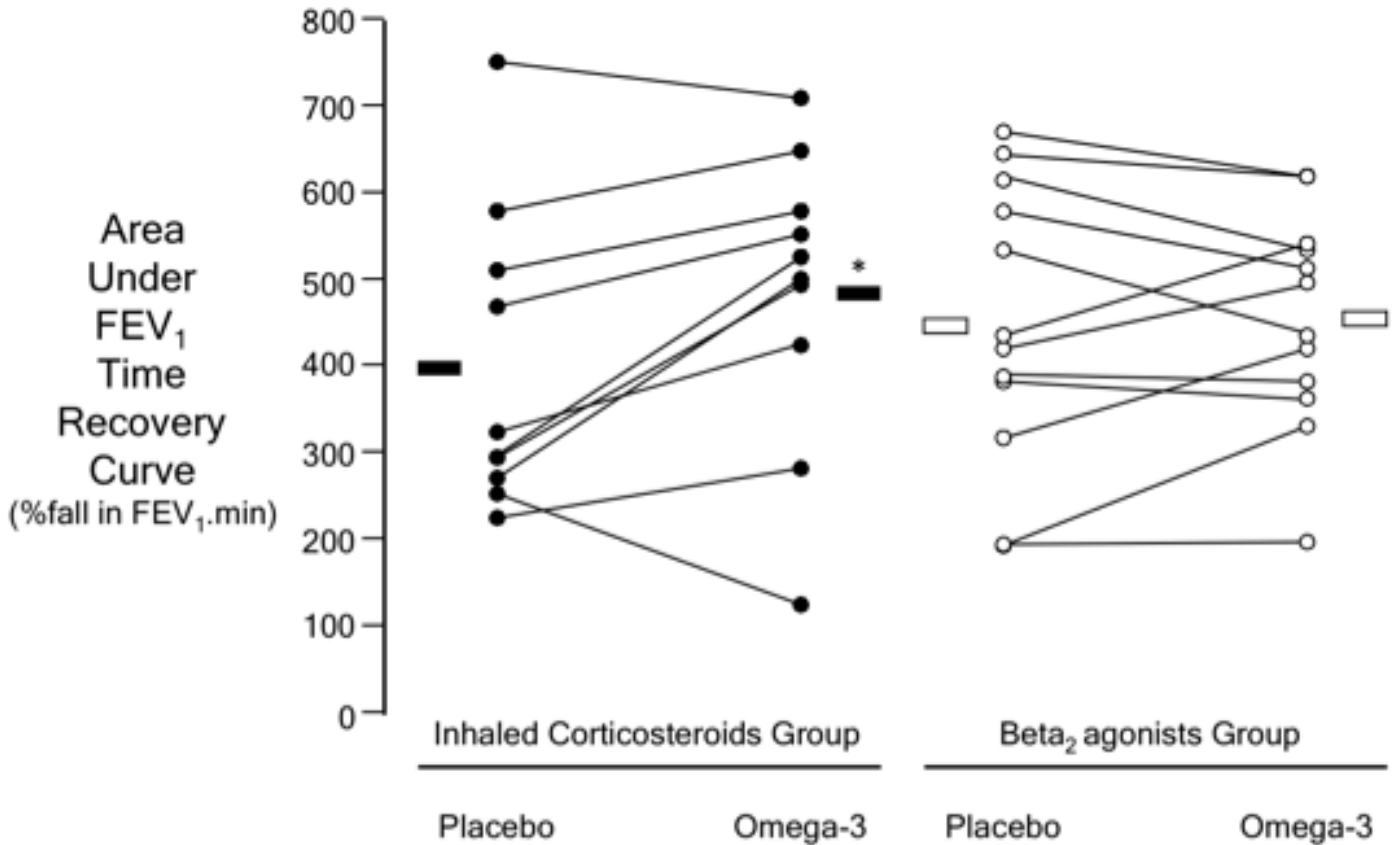

There was a significantly longer time to recover for those on inhaled corticosteroids ( $p=0.04$ ), however there was no difference in the % fall in FEV<sub>1</sub> or the maximum cumulative dose of mannitol (mg) administered following placebo or omega-3: For those on inhaled corticosteroids; placebo  $26\pm 7\%$ , vs omega-3  $27\pm 10\%$  ( $p=0.51$ ) and placebo  $271\pm 173\text{mg}$  vs omega-3  $290\pm 207\text{mg}$  ( $p=0.67$ ); For those on beta<sub>2</sub> agonists alone; placebo  $24\pm 5\%$  vs omega-3  $27\pm 4\%$  ( $p=0.29$ ) and placebo  $171\pm 173\text{mg}$  vs omega-3  $148\pm 114\text{mg}$  ( $p=0.65$ ).

*Online supplements are not copyedited prior to posting.*

**e-Table 2. PD<sub>15</sub> values before and following each treatment period**

| Treatment Sub-groups                     | n  | Visit <sub>run-in</sub> | Pre-Treatment 1 | *Pre-Treatment 2 | Placebo          | Omega-3          |
|------------------------------------------|----|-------------------------|-----------------|------------------|------------------|------------------|
| PD <sub>15</sub> (mg)                    |    |                         |                 |                  |                  |                  |
| Visit (weeks)                            |    | -2                      | 0               | 6                | 3 or 9#          | 3 or 9#          |
| No.                                      |    |                         |                 |                  |                  |                  |
| 1                                        |    | 71.1                    | 18.0            | 161.8            | 118.9            | 49.3             |
| 2                                        |    | 50.6                    | 35.9            | 35.5             | 38.0             | 61.6             |
| 3                                        |    | 181.6                   | 194.0           | 358.2            | 130.9            | 169.2            |
| 4                                        |    | 88.4                    | 84.9            | 91.9             | 92.5             | 92.4             |
| 5                                        |    | 126.6                   | 82.4            | 161.4            | 370.2            | 204.9            |
| 6                                        |    | 136.4                   | 202.7           | 277.8            | 346.5            | 310.8            |
| 7                                        |    | 65.5                    | 20.2            | 16.3             | 48.6             | 17.1             |
| 8                                        |    | 81.5                    | 150.4           | 100.1            | 75.6             | 74.9             |
| 9                                        |    | 293.4                   | 195.2           | 202.1            | 156.1            | 135.3            |
| 10                                       |    | 45.4                    | 33.7            | 58.6             | 92.8             | 84.6             |
| 11                                       |    | 282.0                   | 173.7           | 147.5            | 169.2            | 635 <sup>^</sup> |
| 12                                       |    |                         | 85.8            | 241.8            | 462.5            | 214.7            |
| 13                                       |    |                         | 20.9            | 58.9             | 51.2             | 26.9             |
| 14                                       |    |                         | 20.6            | 18.9             | 12.4             | 43.5             |
| 15                                       |    |                         | 34.9            | 9.1              | 15.3             | 8.8              |
| 16                                       |    |                         | 70.9            | 224.3            | 635 <sup>^</sup> | 85.7             |
| 17                                       |    |                         | 73.7            | 92.1             | 104.6            | 167.5            |
| 18                                       |    |                         | 122.6           | 134.8            | 67.1             | 135.9            |
| 19                                       |    |                         | 33.4            | 19.7             | 24.5             | 21.2             |
| 20                                       |    |                         | 116.0           | 58.4             | 79.0             | 92.2             |
| 21                                       |    |                         | 9.9             | 36.4             | 73.8             | 31.3             |
| 22                                       |    |                         | 37.4            | 25.0             | 110.9            | 116.7            |
| 23                                       |    |                         | 220.2           | 49.4             | 46.7             | 20.6             |
| Geometric mean PD <sub>15</sub> (95% CI) |    |                         |                 |                  |                  |                  |
| Total Group                              | 23 |                         | 62<br>(41, 92)  | 74<br>(47, 114)  | 88<br>(56, 139)  | 78<br>(51, 119)  |
| Inhaled Corticosteroids                  | 11 | 107<br>(69, 164)        | 78<br>(41, 147) | 108<br>(57,200)  | 118<br>(73, 191) | 110<br>(57, 211) |
| Beta <sub>2</sub> agonists p.r.n.        | 12 |                         | 50<br>(28, 89)  | 52<br>(27, 99)   | 67<br>(30, 151)  | 57<br>(31, 102)  |

\*Pre-Treatment 2 is following 3-week washout of Treatment 1, # randomised thus occurred at either 3 or 9 weeks, ^ No PD<sub>15</sub> obtained and arbitrary value of 635mg assigned. Visit<sub>run-in</sub> was performed in the sub-group taking ICS only.

*Online supplements are not copyedited prior to posting.*

## REFERENCES

- 1 Brannan JD, Anderson SD, Perry CP, et al. The safety and efficacy of inhaled dry powder mannitol as a bronchial provocation test for airway hyperresponsiveness: a phase 3 comparison study with hypertonic (4.5%) saline. *Respir Res* 2005;6:144
- 2 Pizzichini MM, Popov TA, Efthimiadis A, et al. Spontaneous and induced sputum to measure indices of airway inflammation in asthma. *Am J Respir Crit Care Med* 1996;154(4 Pt 1):866-869
- 3 Juniper EF, Guyatt GH, Epstein RS, et al. Evaluation of impairment of health related quality of life in asthma: development of a questionnaire for use in clinical trials. *Thorax* 1992;47(2):76-83
- 4 Juniper EF, O'Byrne PM, Guyatt GH, et al. Development and validation of a questionnaire to measure asthma control. *Eur Respir J* 1999;14(4):902-907
- 5 Harris WS. n-3 fatty acids and serum lipoproteins: human studies. *Am J Clin Nutr* 1997;65(5 Suppl):1645S-1654S
- 6 Lundstrom SL, Balgoma D, Wheelock AM, et al. Lipid mediator profiling in pulmonary disease. *Current pharmaceutical biotechnology* 2011;12(7):1026-1052
- 7 Psychogios N, Hau DD, Peng J, et al. The human serum metabolome. *PLoS ONE* 2011;6(2):e16957
- 8 O'Sullivan S, Roquet A, Dahlén B, et al. Evidence for mast cell activation during exercise-induced bronchoconstriction. *Eur Respir J* 1998;12(2):345-350
- 9 Kumlin M, Stensvad F, Larsson L, et al. Validation and application of a new simple strategy for measurements of urinary leukotriene E4 in humans. *Clin Exp Allergy* 1995;25(5):467-479
- 10 Larsson J, Perry CP, Anderson SD, et al. The occurrence of refractoriness and mast cell mediator release following mannitol-induced bronchoconstriction. *J Appl Physiol* 2011;110(4):1029-1035
- 11 Yang J, Schmelzer K, Georgi K, et al. Quantitative profiling method for oxylipin metabolome by liquid chromatography electrospray ionization tandem mass spectrometry. *Anal Chem* 2009;81(19):8085-8093
- 12 Newman JW, Watanabe T, Hammock BD. The simultaneous quantification of cytochrome P450 dependent linoleate and arachidonate metabolites in urine by HPLC-MS/MS. *Journal of lipid research* 2002;43(9):1563-1578
- 13 Lundstrom SL, D'Alexandri FL, Nithipatikom K, et al. HPLC/MS/MS-based approaches for detection and quantification of eicosanoids. *Methods Mol Biol* 2009;579:161-187
- 14 Lundstrom SL, Levanen B, Nording M, et al. Asthmatics exhibit altered oxylipin profiles compared to healthy individuals after subway air exposure. *PLoS ONE* 2011;6(8):e23864
- 15 Balogma D, Larsson J, Rokach J, Lawson JA, Daham K, Dahlén B, Dahlén SE, Wheelock CE. Quantification of lipid mediator metabolites in human urine from asthma patients by electrospray ionisation mass spectrometry: controlling matrix effects. *Anal Chem*. 2013;85(16):7866-7874.

*Online supplements are not copyedited prior to posting.*
